# Supplementary material for: Lysophosphatidylinositol Promotes Chemotaxis and Cytokine Synthesis in Mast Cells with Differential Participation of GPR55 and CB2 Receptors
Source: MDPI journal article supplement (doi:10.3390/ijms24076316), 2023-03-28
Supplement: s1 [file s1]

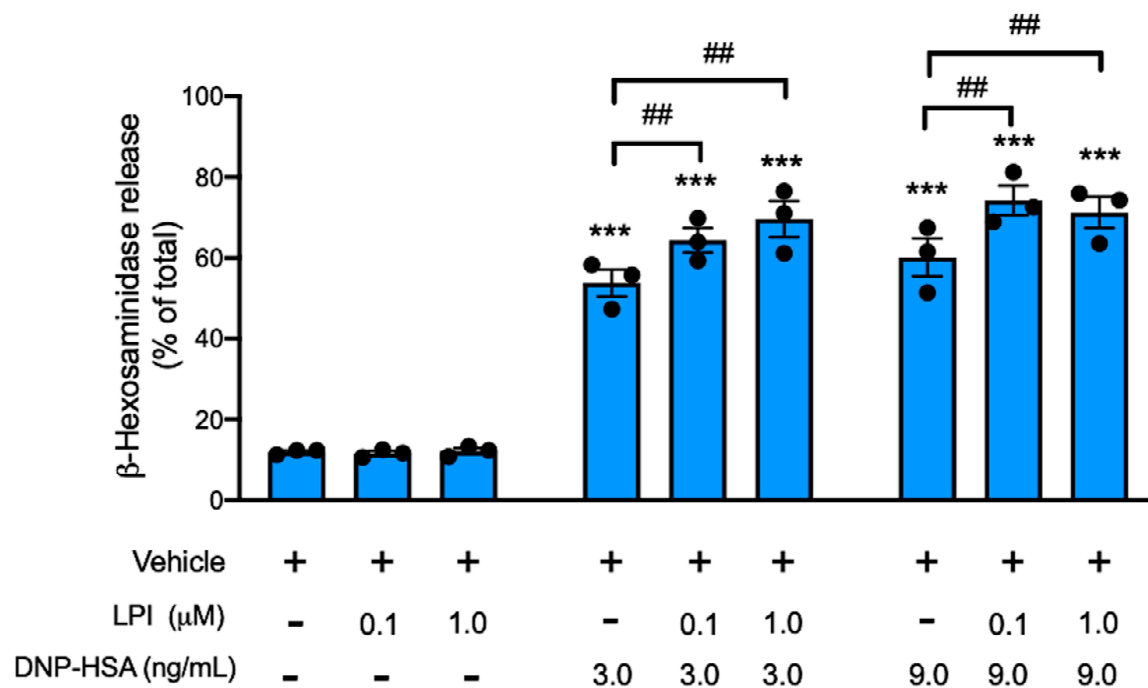

**Figure S1.**  $\beta$ -Hexosaminidase release in response to LPI alone or in the presence of two sub-optimal antigen concentrations in BMDCs. When required, LPI was added two minutes before DNP-HSA, \*\*\*  $p < 0.001$  vs. vehicle-treated cells in the absence of antigen; ##  $p < 0.01$  vs. vehicle pre-treated cells in the presence of antigen.
