# Supplementary material for: Lysophosphatidylinositol Promotes Chemotaxis and Cytokine Synthesis in Mast Cells with Differential Participation of GPR55 and CB2 Receptors
Source: Int J Mol Sci. 2023 Mar 28;24(7):6316. doi: 10.3390/ijms24076316 (PMC10094727; doi:10.3390/ijms24076316)
Supplement: Supplementary file 1 [file ijms-24-06316-s001.zip]

Archive with 4 entries (4 files):
- SUPPL FIG 1.pdf
- Suppl_Video_1_LPI .mp4
- Suppl_Video_2_ML-193 + LPI .mp4
- Suppl_Video_3_AM630 + LPI .mp4
